# Supplementary material
Source: PubMed Central journal article supplement (PMC3365993)

## SUPPLEMENTAL INFORMATION

Induction of Bv8 expression by granulocyte-colony stimulating factor in CD11b<sup>+</sup>Gr1<sup>+</sup> cells: Key role of Stat3 signaling

Xueping Qu, Guanglei Zhuang, Lanlan Yu, Gloria Meng and Napoleone Ferrara

### **Supplemental Figure 1 legend.**

Taqman analysis to evaluate mBv8 expression in CD11b<sup>+</sup> Ly6G<sup>+</sup>, and CD11b<sup>+</sup> Ly6C<sup>+</sup> cells after incubation with 10ng/ml G-CSF or PBS for 4 hours. Error bars represent SEM. Single asterisk indicates significant difference in mBv8 expression between G-CSF and PBS treated groups (P<0.05). Double asterisk indicates significant difference in mBv8 expression between the two cell subsets (P<0.05). Data shown are representative of three independent experiments.

Supplemental Figure 1.

A

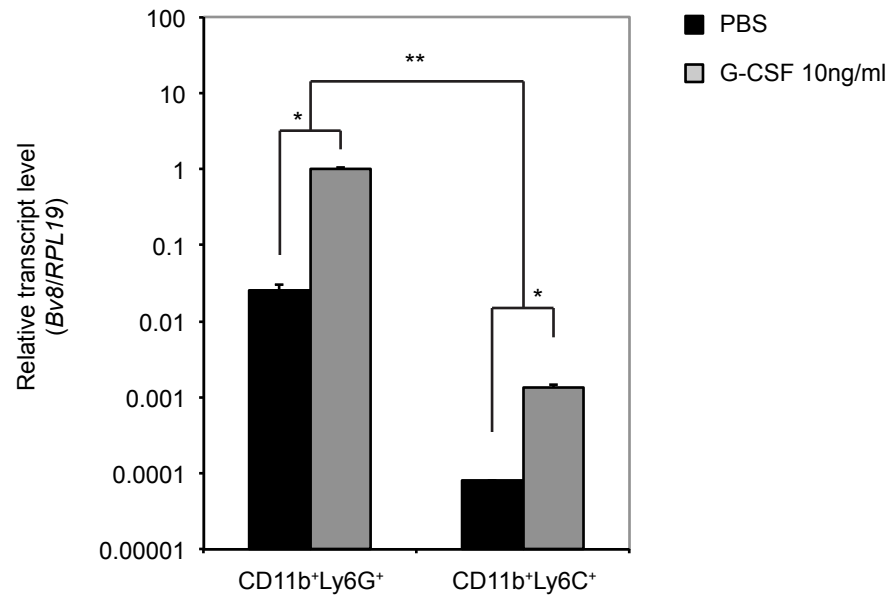

Supplement: supp_M111.326801_jbc.M111.326801-1.pdf [file supp_M111.326801_jbc.M111.326801-1.pdf]
